# Supplementary material for: DeNTNet: Deep Neural Transfer Network for the detection of periodontal bone loss using panoramic dental radiographs
Source: PubMed Central journal article supplement (PMC6879527; doi:10.1038/s41598-019-53758-2), 2019-11-26
Supplement: 41598_2019_53758_MOESM1_ESM.pdf [file 41598_2019_53758_MOESM1_ESM.pdf]

# DeNTNet : Deep Neural Transfer Network for the detection of periodontal bone loss using panoramic dental radiographs

Jaeyoung Kim<sup>1</sup>, Hong-seok Lee<sup>1</sup>, In-Seok Song<sup>2,\*</sup>, and Kyu-Hwan Jung<sup>1,\*</sup>

<sup>1</sup>VUNO Inc., 6F, 507, Gangnam-daero, Seocho-gu, Seoul, South Korea

<sup>2</sup>Department of Oral and Maxillofacial Surgery, Korea University Anam Hospital, Seoul, South Korea

\*densis@korea.ac.kr, khwan.jung@vuno.co

## ABSTRACT

This document provides additional data and figures to supplement the paper “DeNTNet : Deep Neural Transfer Network for the detection of periodontal bone loss using panoramic dental radiographs .”

## Data Statistics

| Data Split               |           | Training Set  | Validation Set | Test Set   |
|--------------------------|-----------|---------------|----------------|------------|
| Number of Patients       |           | 11,189        | 190            | 800        |
| Sex                      | Male      | 5,482(49%)    | 106(56%)       | 384(48%)   |
|                          | Female    | 5,707(51%)    | 84(44%)        | 416(52%)   |
| Age Group                | 20-29     | 1,903(17%)    | 34(18%)        | 96(12%)    |
|                          | 30-39     | 1,231(11%)    | 30(16%)        | 64(8%)     |
|                          | 40-49     | 1,343(12%)    | 35(18%)        | 120(15%)   |
|                          | 50-59     | 2,126(19%)    | 36(19%)        | 184(23%)   |
|                          | 60-69     | 2,394(21%)    | 17(9%)         | 176(22%)   |
|                          | ≥70       | 2,237(20%)    | 38(20%)        | 160(20%)   |
| Patient-level Prevalence | Incisors  | 2,674(24%)    | 58(31%)        | 217(27%)   |
|                          | Canines   | 2,747(25%)    | 57(30%)        | 201(25%)   |
|                          | Premolars | 3,285(34%)    | 72(38%)        | 284(36%)   |
|                          | Molars    | 3,848(29%)    | 89(33%)        | 363(35%)   |
|                          | Total     | 4,415(39%)    | 92(48%)        | 410(51%)   |
| Tooth-level Prevalence   | Incisors  | 13,065(10%)   | 273(12%)       | 939(10%)   |
|                          | Canines   | 7,173(16%)    | 137(18%)       | 468(15%)   |
|                          | Premolars | 14,037(16%)   | 316(21%)       | 1,041(16%) |
|                          | Molars    | 14,333(11%)   | 353(15%)       | 1,327(14%) |
|                          | Total     | 48,608(13.5%) | 1,079(18%)     | 3,775(15%) |

**Table 1.** Statistics of training, validation, and test datasets. The datasets were obtained from various sex and age patient group. The patient-level and tooth-level prevalence is also described for all teeth types including incisors, canines, premolars, and molars.

## Architecture Details of DeNTNet

### ROI and lesion segmentation model

| Layer         | Output Shape    | Connected to                   | Kernel size | Activation | Batch Normalization |
|---------------|-----------------|--------------------------------|-------------|------------|---------------------|
| Input Image   | [512, 1024, 1]  |                                |             |            |                     |
| Conv-Layer 1  | [512, 1024, 32] | Input Image                    | [3 × 3]     | ReLU       | True                |
| Conv-Layer 2  | [512, 1024, 32] | Conv-Layer 1                   | [3 × 3]     | ReLU       | True                |
| Max-Pooling 1 | [256, 512, 32]  | Conv-Layer 2                   | [2 × 2]     |            |                     |
| Conv-Layer 3  | [256, 512, 64]  | Max-Pooling 1                  | [3 × 3]     | ReLU       | True                |
| Conv-Layer 4  | [256, 512, 64]  | Conv-Layer 3                   | [3 × 3]     | ReLU       | True                |
| Max-Pooling 2 | [128, 256, 64]  | Conv-Layer 4                   | [2 × 2]     |            |                     |
| Conv-Layer 5  | [128, 256, 128] | Max-Pooling 2                  | [3 × 3]     | ReLU       | True                |
| Conv-Layer 6  | [128, 256, 128] | Conv-Layer 5                   | [3 × 3]     | ReLU       | True                |
| Max-Pooling 3 | [64, 128, 128]  | Conv-Layer 6                   | [2 × 2]     |            |                     |
| Conv-Layer 7  | [64, 128, 256]  | Max-Pooling 3                  | [3 × 3]     | ReLU       | True                |
| Conv-Layer 8  | [64, 128, 256]  | Conv-Layer 7                   | [3 × 3]     | ReLU       | True                |
| Max-Pooling 4 | [32, 64, 256]   | Conv-Layer 8                   | [2 × 2]     |            |                     |
| Conv-Layer 9  | [32, 64, 512]   | Max-Pooling 4                  | [3 × 3]     | ReLU       | True                |
| Conv-Layer 10 | [32, 64, 512]   | Conv-Layer 9                   | [3 × 3]     | ReLU       | True                |
| Up-Sampling 1 | [64, 128, 512]  | Conv-Layer 10                  | [2 × 2]     |            |                     |
| Conv-Layer 11 | [64, 128, 256]  | Up-Sampling 1                  | [3 × 3]     | ReLU       | True                |
| Concatenate 1 | [64, 128, 512]  | Conv-Layer 8,<br>Conv-Layer 11 |             |            |                     |
| Conv-Layer 12 | [64, 128, 256]  | Concatenate 1                  | [3 × 3]     | ReLU       | True                |
| Conv-Layer 13 | [64, 128, 256]  | Conv-Layer 12                  | [3 × 3]     | ReLU       | True                |
| Up-Sampling 2 | [128, 256, 256] | Conv-Layer 13                  | [2 × 2]     |            |                     |
| Conv-Layer 14 | [128, 256, 128] | Up-Sampling 2                  | [3 × 3]     | ReLU       | True                |
| Concatenate 2 | [128, 256, 256] | Conv-Layer 6,<br>Conv-Layer 14 |             |            |                     |
| Conv-Layer 15 | [128, 256, 128] | Concatenate 2                  | [3 × 3]     | ReLU       | True                |
| Conv-Layer 16 | [128, 256, 128] | Conv-Layer 15                  | [3 × 3]     | ReLU       | True                |
| Up-Sampling 3 | [256, 512, 128] | Conv-Layer 16                  | [2 × 2]     |            |                     |
| Conv-Layer 17 | [256, 512, 64]  | Up-Sampling 3                  | [3 × 3]     | ReLU       | True                |
| Concatenate 3 | [256, 512, 128] | Conv-Layer 4,<br>Conv-Layer 17 |             |            |                     |
| Conv-Layer 18 | [256, 512, 64]  | Concatenate 3                  | [3 × 3]     | ReLU       | True                |
| Conv-Layer 19 | [256, 512, 64]  | Conv-Layer 18                  | [3 × 3]     | ReLU       | True                |
| Up-Sampling 4 | [512, 1024, 64] | Conv-Layer 19                  | [2 × 2]     |            |                     |
| Conv-Layer 20 | [512, 1024, 32] | Up-Sampling 4                  | [3 × 3]     | ReLU       | True                |
| Concatenate 4 | [512, 1024, 64] | Conv-Layer 2,<br>Conv-Layer 20 |             |            |                     |
| Conv-Layer 21 | [512, 1024, 32] | Concatenate 4                  | [3 × 3]     | ReLU       | True                |
| Conv-Layer 22 | [512, 1024, 32] | Conv-Layer 21                  | [3 × 3]     | ReLU       | True                |
| Conv-Layer 23 | [512, 1024, 2]  | Conv-Layer 22                  | [1 × 1]     | Softmax    |                     |

**Table 2.** Network architecture of ROI and lesion segmentation model

### Tooth-level classification model

| Layer           | Output Shape    | Connected to   | Kernel size | Activation | Batch Normalization |
|-----------------|-----------------|----------------|-------------|------------|---------------------|
| Input Image     | [512, 1024, 1]  |                |             |            |                     |
| Conv-Layer 1    | [512, 1024, 32] | Input Image    | [3 × 3]     | ReLU       | True                |
| Conv-Layer 2    | [512, 1024, 32] | Conv-Layer 1   | [3 × 3]     | ReLU       | True                |
| Max-Pooling 1   | [256, 512, 32]  | Conv-Layer 2   | [2 × 2]     |            |                     |
| Conv-Layer 3    | [256, 512, 64]  | Max-Pooling 1  | [3 × 3]     | ReLU       | True                |
| Conv-Layer 4    | [256, 512, 64]  | Conv-Layer 3   | [3 × 3]     | ReLU       | True                |
| Max-Pooling 2   | [128, 256, 64]  | Conv-Layer 4   | [2 × 2]     |            |                     |
| Conv-Layer 5    | [128, 256, 128] | Max-Pooling 2  | [3 × 3]     | ReLU       | True                |
| Conv-Layer 6    | [128, 256, 128] | Conv-Layer 5   | [3 × 3]     | ReLU       | True                |
| Max-Pooling 3   | [64, 128, 128]  | Conv-Layer 6   | [2 × 2]     |            |                     |
| Conv-Layer 7    | [64, 128, 256]  | Max-Pooling 3  | [3 × 3]     | ReLU       | True                |
| Conv-Layer 8    | [64, 128, 256]  | Conv-Layer 7   | [3 × 3]     | ReLU       | True                |
| Max-Pooling 4   | [32, 64, 256]   | Conv-Layer 8   | [2 × 2]     |            |                     |
| Conv-Layer 9    | [32, 64, 512]   | Max-Pooling 4  | [3 × 3]     | ReLU       | True                |
| Conv-Layer 10   | [32, 64, 512]   | Conv-Layer 9   | [3 × 3]     | ReLU       | True                |
| Conv-Layer 11   | [32, 64, 1024]  | Conv-Layer 10  | [3 × 3]     | ReLU       | True                |
| Conv-Layer 12   | [32, 64, 1024]  | Conv-Layer 11  | [3 × 3]     | ReLU       | True                |
| AveragePooling  | [1024]          | Conv-Layer 12  | [32 × 64]   |            |                     |
| Dropout 1 (0.8) | [1024]          | AveragePooling |             |            |                     |
| Dense-Layer 1   | [512]           | Dropout 1      |             | ReLU       |                     |
| Dropout 2 (0.8) | [1024]          | Dense-Layer 1  |             |            |                     |
| Dense-Layer 2   | [32]            | Dropout 2      |             | Sigmoid    |                     |

**Table 3.** Network architecture of tooth-level classification model.

## Tooth-level performance comparison between the proposed method and dental clinicians

### F1 score

| <b>Upper Right</b> | 11(I)        | 12(I)        | 13(C)        | 14(P)        | 15(P)        | 16(M)        | 17(M)        | 18(M)        |
|--------------------|--------------|--------------|--------------|--------------|--------------|--------------|--------------|--------------|
| No.                | 87/800       | 100/800      | 111/800      | 113/800      | 130/800      | 148/800      | 169/800      | 26/800       |
| Clinician 1        | 0.613        | 0.652        | 0.664        | 0.642        | 0.678        | 0.801        | 0.803        | 0.807        |
| Clinician 2        | 0.593        | 0.625        | 0.636        | 0.656        | 0.703        | 0.769        | 0.769        | 0.653        |
| Clinician 3        | 0.587        | 0.624        | 0.629        | 0.650        | 0.701        | 0.759        | 0.793        | 0.627        |
| Clinician 4        | 0.640        | 0.661        | 0.650        | 0.637        | 0.686        | 0.789        | 0.823        | 0.677        |
| Clinician 5        | 0.653        | 0.629        | 0.679        | 0.651        | 0.664        | 0.730        | 0.793        | 0.754        |
| Clinician Average  | 0.617        | 0.638        | 0.651        | 0.647        | 0.686        | 0.769        | 0.796        | <b>0.703</b> |
| DeNTNet (Baseline) | 0.615        | 0.660        | 0.689        | 0.690        | 0.612        | 0.699        | 0.668        | 0.185        |
| DeNTNet            | <b>0.757</b> | <b>0.734</b> | <b>0.765</b> | <b>0.780</b> | <b>0.761</b> | <b>0.820</b> | <b>0.829</b> | 0.666        |
| <b>Upper Left</b>  | 21(I)        | 22(I)        | 23(C)        | 24(P)        | 25(P)        | 26(M)        | 27(M)        | 28(M)        |
| No.                | 83/800       | 90/800       | 95/800       | 97/800       | 125/800      | 147/800      | 147/800      | 18/800       |
| Clinician 1        | 0.623        | 0.627        | 0.626        | 0.614        | 0.674        | 0.790        | 0.731        | 0.717        |
| Clinician 2        | 0.572        | 0.577        | 0.616        | 0.611        | 0.659        | 0.748        | 0.700        | 0.731        |
| Clinician 3        | 0.584        | 0.635        | 0.576        | 0.617        | 0.703        | 0.751        | 0.735        | 0.682        |
| Clinician 4        | 0.635        | 0.628        | 0.580        | 0.577        | 0.673        | 0.797        | 0.770        | 0.560        |
| Clinician 5        | 0.679        | 0.644        | 0.689        | 0.652        | 0.693        | 0.705        | 0.750        | 0.685        |
| Clinician Average  | 0.618        | 0.622        | 0.617        | 0.614        | 0.680        | 0.758        | 0.737        | <b>0.675</b> |
| DeNTNet (Baseline) | 0.681        | 0.688        | 0.679        | 0.670        | 0.664        | 0.655        | 0.685        | 0.231        |
| DeNTNet            | <b>0.802</b> | <b>0.788</b> | <b>0.761</b> | <b>0.736</b> | <b>0.734</b> | <b>0.777</b> | <b>0.774</b> | 0.545        |
| <b>Lower Left</b>  | 31(I)        | 32(I)        | 33(C)        | 34(P)        | 35(P)        | 36(M)        | 37(M)        | 38(M)        |
| No.                | 141/800      | 151/800      | 135/800      | 133/800      | 162/800      | 169/800      | 167/800      | 18/800       |
| Clinician 1        | 0.646        | 0.649        | 0.612        | 0.623        | 0.700        | 0.775        | 0.772        | 0.651        |
| Clinician 2        | 0.616        | 0.629        | 0.609        | 0.658        | 0.728        | 0.791        | 0.734        | 0.604        |
| Clinician 3        | 0.628        | 0.657        | 0.591        | 0.607        | 0.713        | 0.774        | 0.822        | 0.666        |
| Clinician 4        | 0.674        | 0.674        | 0.680        | 0.684        | 0.726        | 0.765        | 0.822        | 0.510        |
| Clinician 5        | 0.670        | 0.659        | 0.624        | 0.658        | 0.706        | 0.814        | 0.840        | 0.705        |
| Clinician Average  | 0.646        | 0.653        | 0.623        | 0.646        | 0.714        | 0.783        | 0.798        | <b>0.627</b> |
| DeNTNet (Baseline) | 0.662        | 0.681        | 0.703        | <b>0.734</b> | 0.719        | 0.713        | 0.641        | 0.162        |
| DeNTNet            | <b>0.772</b> | <b>0.770</b> | <b>0.722</b> | 0.723        | <b>0.787</b> | <b>0.818</b> | <b>0.791</b> | 0.615        |
| <b>Lower Right</b> | 41(I)        | 42(I)        | 43(C)        | 44(P)        | 45(P)        | 46(M)        | 47(M)        | 48(M)        |
| No.                | 142/800      | 145/800      | 127/800      | 130/800      | 151/800      | 156/800      | 140/800      | 22/800       |
| Clinician 1        | 0.644        | 0.631        | 0.629        | 0.671        | 0.710        | 0.767        | 0.759        | 0.590        |
| Clinician 2        | 0.619        | 0.644        | 0.622        | 0.655        | 0.726        | 0.781        | 0.760        | 0.608        |
| Clinician 3        | 0.625        | 0.639        | 0.592        | 0.618        | 0.743        | 0.827        | 0.806        | 0.624        |
| Clinician 4        | 0.690        | 0.676        | 0.616        | 0.672        | 0.727        | 0.834        | 0.786        | 0.754        |
| Clinician 5        | 0.670        | 0.668        | 0.643        | 0.675        | 0.716        | 0.792        | 0.798        | 0.600        |
| Clinician Average  | 0.649        | 0.651        | 0.620        | 0.658        | 0.724        | 0.800        | 0.781        | 0.635        |
| DeNTNet (Baseline) | 0.642        | 0.680        | 0.669        | <b>0.760</b> | 0.735        | 0.766        | 0.654        | 0.242        |
| DeNTNet            | <b>0.752</b> | <b>0.764</b> | <b>0.747</b> | 0.744        | <b>0.780</b> | <b>0.868</b> | <b>0.814</b> | <b>0.842</b> |

**Table 4.** Comparison F1 score of proposed method to the dental clinicians on the test dataset. I:Incisor, C:Canine, P:Premolar, M:Molar.

## Failure Cases

### Failure cases in the third molar

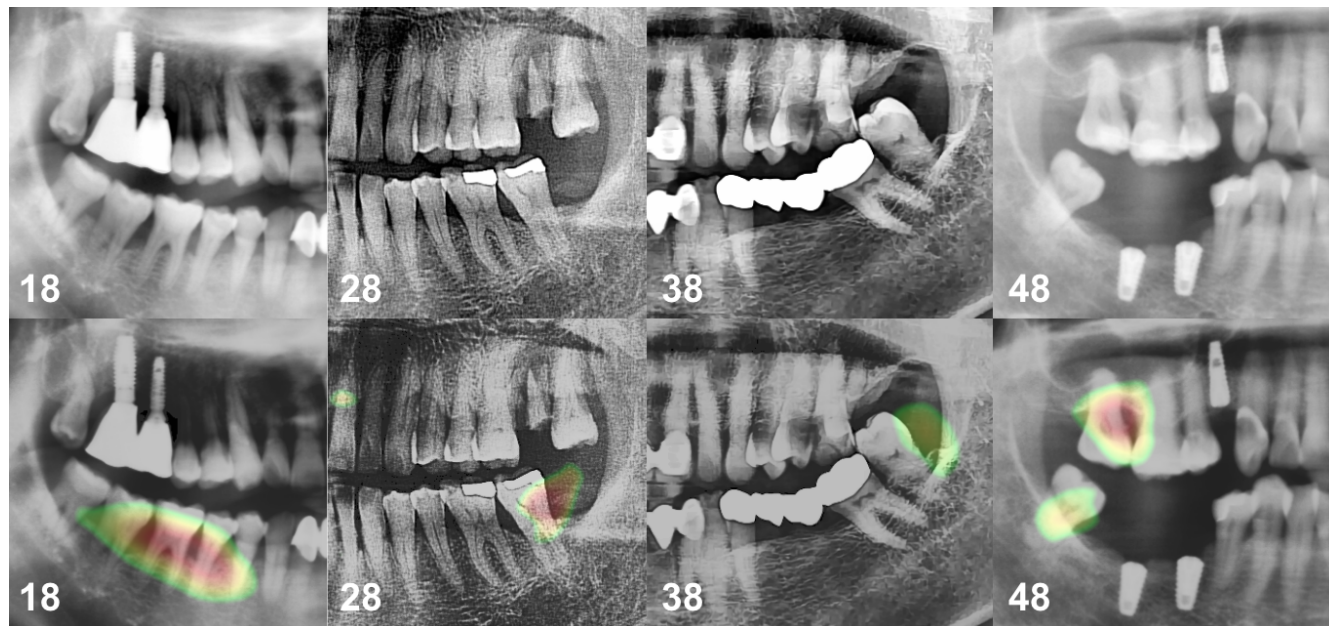

**Figure 1.** False negative cases of detecting PBL in the third molar. The output value of the model was lower than 0.1 for the third molar in these cases. **(18)** There was an implant next to the third molar with teeth number 18, **(28)** The third molar with teeth number 28 was next to a damaged tooth. **(38)** Rotated third molar with teeth number 38. **(48)** There was missing teeth next to the third molar with teeth number 48.
